# Supplementary material
Source: PubMed Central journal article supplement (PMC3969058)

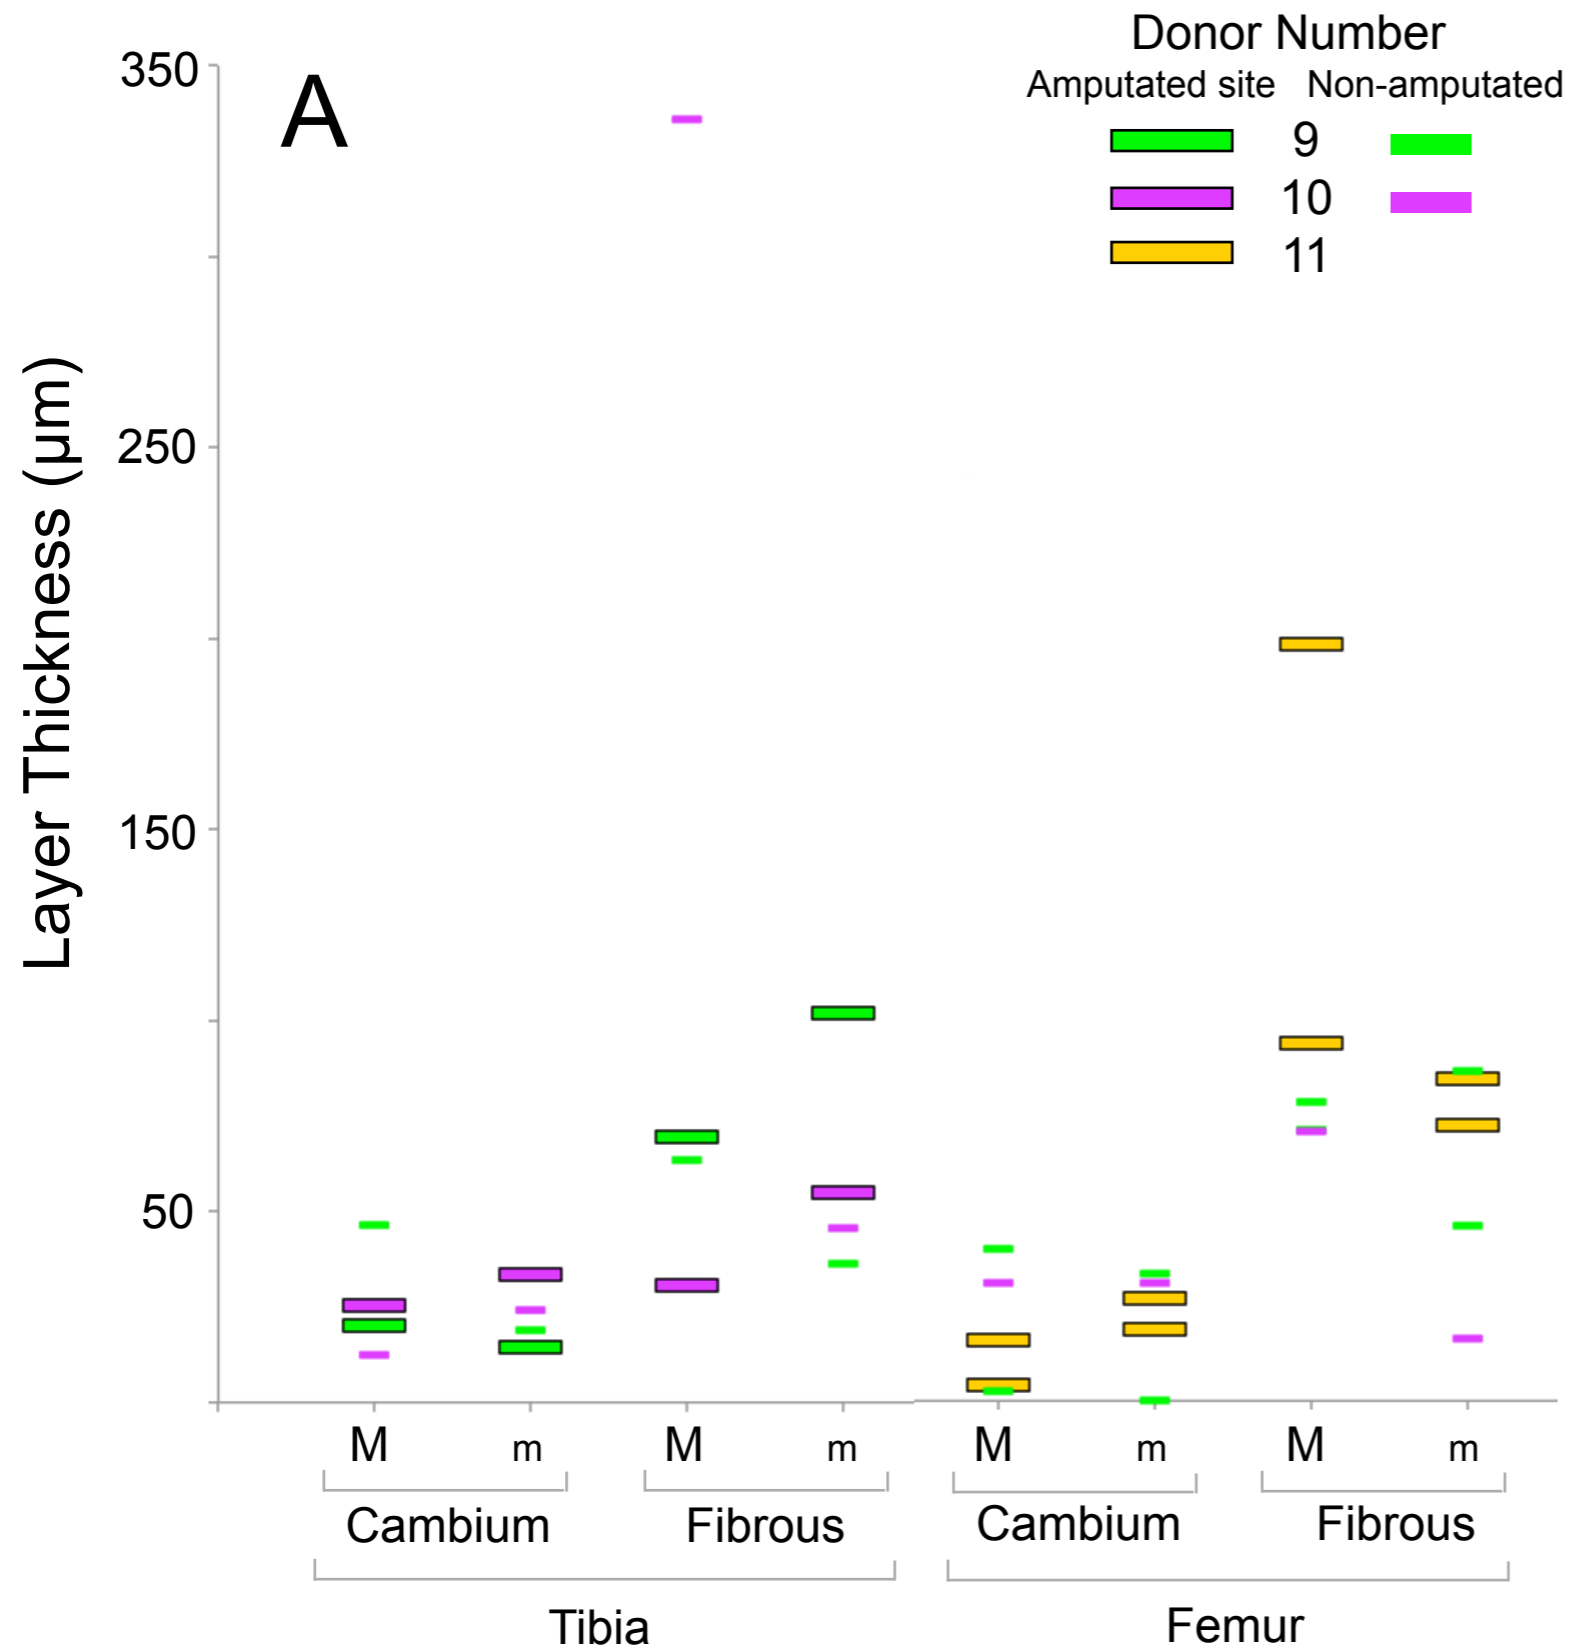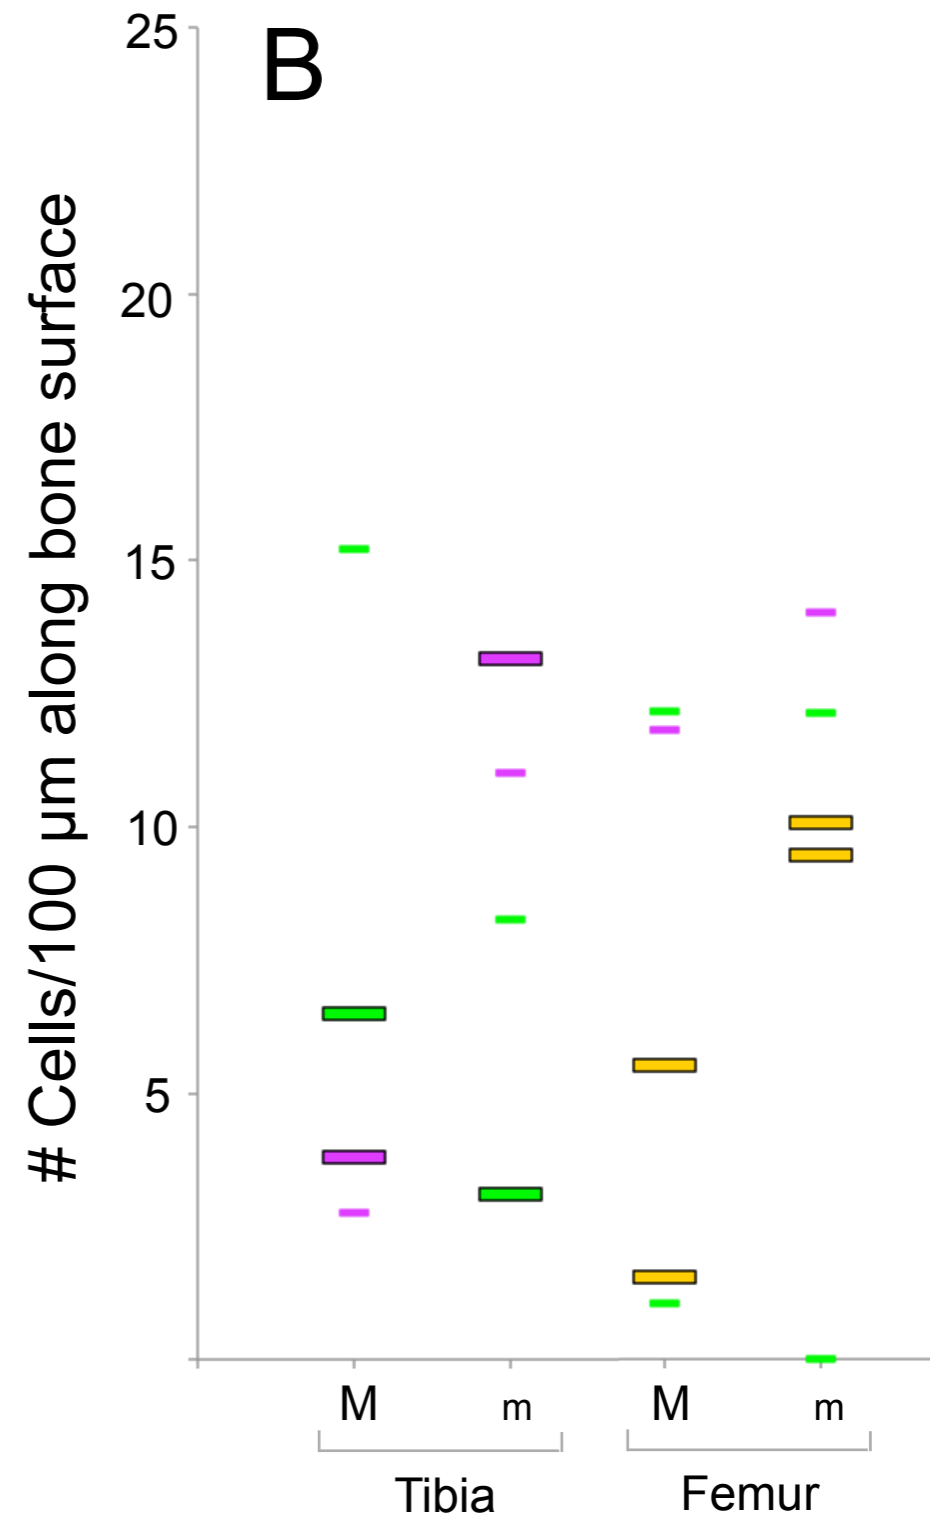

Supplement: joa0224-0142-sd1.pdf [file joa0224-0142-sd1.pdf]
